# Nitrogen availability drives gene length of dominant prokaryotes and diversity of genes acquiring Nitrogen-species in oceanic systems

**Short title:** Gene length of marine prokaryotes

Leon Dlugosch<sup>1</sup>, Anja Poehlein<sup>2</sup>, Bernd Wemheuer<sup>2</sup>, Birgit Pfeiffer<sup>2</sup>, Helge-A. Giebel<sup>1</sup>, Rolf Daniel<sup>2</sup>, Meinhard Simon<sup>1,3\*</sup>

<sup>1</sup>Institute for Chemistry and Biology of the Marine Environment,

University of Oldenburg, Carl von Ossietzky Str. 9-11, D-26129 Oldenburg, Germany

<sup>2</sup>Department of Genomic and Applied Microbiology and Göttingen Genomics Laboratory,

Institute of Microbiology and Genetics, Georg-August University of Göttingen,

Grisebachstr. 8, D-37077 Göttingen, Germany

<sup>3</sup> Helmholtz Institute for Functional Marine Biodiversity at the University of Oldenburg (HIFMB),

Ammerländer Heerstraße 231, D-26129 Oldenburg, Germany

\* Corresponding author: Meinhard Simon (m.simon@icbm.de)

## Abstract

Nitrogen (N) is a key element for prokaryotes in the oceans and often limits phytoplankton primary production. An untested option to reduce prokaryotic N-demand under N-limitation is to reduce gene length. Here we show that in the sunlit Atlantic Ocean genes of the prokaryotic microbial communities in the permanently stratified N-limited (sub)tropics are up to 20% shorter than in N-replete regions further south and north. Average gene length (AGL) of major pelagic prokaryotic genera and two virus families correlated positively with nitrate concentrations. Further, the genomic G+C content of 60% of the taxa was lower and the gene repertoire to acquire inorganic and organic N-species higher in N-limited than in N-replete regions. A comparison of the N-demand by reducing gene length or G+C content showed that the former is much more efficient to save N. Our findings introduce a novel and most effective mode of evolutionary adaptation of prokaryotes to save resources including N and energy. They further show an enhanced diversification of genes acquiring N-species and -compounds in N-deplete relative to N-replete regions and thus add important information for a better understanding of the evolutionary adaptation of prokaryotes to N-availability in oceanic systems.

## 39 Main

40 Genome evolution in prokaryotes is largely driven by mutation and horizontal gene transfer (HGT)  
41 resulting in acquisition and deletion of genes<sup>1-3</sup>. Whereas HGT leads to gain or loss of entire genes or  
42 gene clusters, mutation initially leads to gene modification, either non-synonymous or synonymous,  
43 and possibly to deletion of codons or pseudogenes and eventually of genes<sup>1,4,5</sup>. Gene length is thus  
44 affected by mutational changes and reflected in the variation of AGL in different prokaryotes<sup>1</sup>.  
45 However, it is unknown whether gene length is affected by evolutionary constraints such as growth  
46 limitation by nutrients or elements such as N. Under relaxing growth conditions, evolving  
47 prokaryotes increase their genomic G+C content to improve their fitness, driven by mutation bias  
48 and other, not fully understood selective forces<sup>3,6</sup>. The genomic G+C content of the majority of auto-  
49 and heterotrophic bacterial classes and families is positively correlated with their genome size<sup>7</sup>,  
50 implying that genome expansion by acquisition of beneficial traits via HGT increases the G+C content.  
51 Despite this general trend, under strong environmental constraints genome size, the genomic G+C  
52 content, and purifying selection towards a reduced genomic N-content of prokaryotes underlies  
53 selective forces leading to a reduced G+C content and genome size to utilize limiting resources more  
54 efficiently. A consistently low ratio of nonsynonymous polymorphisms to synonymous  
55 polymorphisms in the Tara Ocean prokaryotic gene set and the identification of nitrate as the  
56 strongest environmental variable correlating with this ratio indicates that purifying selection drives  
57 the reduced genomic N-content of oceanic prokaryotes<sup>8</sup>. The relatively low G+C content and small  
58 genomes of bacterial lineages in stratified oceans, in particular the abundant cyanobacterium  
59 *Prochlorococcus*, the alphaproteobacterial *Pelagibacteraceae*/SAR11 and the gammaproteobacterial  
60 SAR86 clades, are the result of genome streamlining<sup>2</sup> and strong N-limitation<sup>4,9</sup> because the  
61 nucleobases G+C require one atom more N than A+T. This strong forcing by N-availability and  
62 minimizing N-cost affects also the proteome of these pelagic bacterial lineages<sup>9,10</sup>. Genes with a  
63 lower G+C content encode amino acids with reduced N per amino acid residue side chain (N-ARSC)  
64 even though the mass of amino acids concurrently expands, presumably as response to maintain

65 fitness and protein function<sup>10,11</sup>. The strong N-limitation of phytoplankton primary production in the  
66 ocean is restricted to the permanently stratified mixed layer of tropical and subtropical regions<sup>12</sup>. In  
67 other regions and below the mixed layer different environmental and biotic drivers such as limitation  
68 by Carbon, other elements or temperature may control growth, the genomic G+C content and  
69 genome size of prokaryotic lineages<sup>9,10,13</sup>. However, there is no information available on the AGL,  
70 genomic G+C content, and N-ARSC of pelagic prokaryotic communities over ocean-wide latitudinal  
71 gradients with pronounced differences in N-availability and how they relate to nitrate  
72 concentrations, i.e. N-limitation of primary production.

73

## 74 **Results and Discussion**

### 75 **Gene length of oceanic prokaryotes is a function of N availability**

76 We assessed AGL, genomic G+C content and N-ARSC of the Atlantic Ocean Microbiome (AOM) over a  
77 13,000 km transect from 62°S to 47°N covering regions of greatly varying N-availabilities (Fig. 1a-b,  
78 Supplementary Table 1). The transect included the tropics and subtropics where primary production  
79 is strongly N-limited (South Atlantic Gyre: SAG; North Atlantic Gyre: NAG), the temperate regions  
80 with seasonally fluctuating N-availabilities (South Atlantic: SA; North Atlantic: NA) and the Southern  
81 Ocean (SO) with permanently high nitrate concentrations<sup>12,14</sup>. Samples of the 0.2 to 3.0 µm-fraction  
82 collected at 22 stations at a depth of 20 m were paired-end shotgun Illumina sequenced resulting in a  
83 total of 206 Gb with a sample mean of 8.9±5.3 Gb (Supplementary Table 2). After assembly (total  
84 assembly length: >17.52 Gb), 12.05 million (M) gene sequences were predicted, and from these  
85 sequences we reconstructed the AOM reference gene catalogue (AOM-RGC) containing 7.75 M non-  
86 redundant (nr) protein-coding sequences, of which 56.6% were taxonomically classified. For the  
87 analysis of taxon resolved AGL, a subset of 3.67 M complete genes (55.7% taxonomically classified)  
88 were used. The majority of classified genes (83.9%) affiliated to Bacteria whereas minor proportions  
89 to Archaea, viruses and picoeukaryotes (16.1%). *Prochlorococcus*, *Synechococcus*, *Pelagibacteraceae*,  
90 *Rhodobacteraceae*, the SAR86 and SAR92 clades and *Flavobacteria* constituted the AOM to large

91 extends, but supplemented with other lineages and exhibiting distinct biogeographic patterns  
92 (Supplementary Fig. 1). In total 38% percent of nr genes were functionally annotated by homology to  
93 a KEGG ortholog (KO). N-acquisition pathways comprised  $0.85\pm 0.19\%$  of mapped reads at each  
94 station of which  $54\pm 6\%$  encoded the glutamate synthase pathway. Amino acid transporters  
95 constituted  $0.66\pm 0.11\%$  of all mapped reads. For a complete gene list see Supplementary Table 3.

96 The AGL exhibited a significant bimodal correlation with latitude with highest values in the SO and  
97 NA (Fig. 1c) and correlated also significantly with nitrate (Fig. 2e). A cluster analysis of normalized  
98 AGL of the 117 major prokaryotic genera and two virus families with  $\geq 50$  genes and  $\geq 10$  kb occurring  
99 at  $\geq 50\%$  of all stations showed two main AGL patterns over the transect (Supplementary Fig. 2).

100 Cluster C1 (72% of tested taxa) encompassed all taxa with a bimodal correlation of AGL and latitude  
101 and exhibited a positive correlation with annual mean nitrate concentrations. AGL of taxa of this  
102 cluster were particularly small in the N-depleted (sub)tropics and included the Cyanobacteria  
103 *Prochlorococcus* and *Synechococcus*, the major alphaproteobacterial lineage *Pelagibacter* as well as  
104 the virus families *Podoviridae* and *Myoviridae* (Fig. 2a,b). AGL of this cluster exhibited significant  
105 correlations with latitude ( $r^2=0.141$ ,  $p<0.001$ ) and nitrate (linear;  $r^2=0.164$ ,  $p<0.001$ ). Taxa of cluster  
106 C2 (28% of tested taxa) exhibited no pronounced relationships with latitude ( $r^2=0.04$ ,  $p=0.001$ ) or  
107 nitrate ( $r^2=0.02$ ,  $p<0.001$ ) and encompassed genera like *Polaribacter* of Flavobacteria, *Planktomarina*  
108 of *Rhodobacteraceae* and the gammaproteobacterial SAR86 clade (Fig. 2c,d).

109 The number of prokaryotic genes and genome size over the entire size range of prokaryotic genomes  
110 has been shown to be positively correlated<sup>2</sup>. The prokaryotic AGL, however, has never been related  
111 to genome size, number of genes and genomic G+C content and it is unknown whether it varies with  
112 resource limitation. An analysis of these features of the 16,834 genomes available at NCBI (January  
113 2020) yielded significant correlations between AGL, genome size and G+C content (Supplementary  
114 Figure 3). In oceanic systems, concentrations of inorganic nutrients and in particular of nitrate, often  
115 limiting phytoplankton primary production, can vary by orders of magnitude<sup>12</sup>. The positive  
116 correlation of AGL with nitrate concentration of many major genera of pelagic prokaryotes and two

117 virus families of the AOM implies that N-availability or coupled growth constraints such as energy  
118 limitation drive the adaptive reduction in gene length with decreasing N-concentration. Hence, N-  
119 limitation appears to affect not only genome size, purifying selection towards a reduced genomic  
120 G+C content and N-ARSC of many marine bacterial genera<sup>8-10</sup> but also AGL thus further lowering the  
121 N-demand and energy costs of biosynthetic reactions and DNA-replication. To compare the effect of  
122 saving N by reducing AGL, G+C content or N-ARSC we analyzed the theoretically reduced demand of  
123 N atoms required for nucleotides and amino acids as a function of transcription and translation  
124 cycles for these three variables in observed ranges occurring in marine prokaryotes (see above, Fig.  
125 3). The outcome of this analysis demonstrates the dramatically higher effectiveness of reducing AGL  
126 than the genomic G+C content or N-ARSC in proteins for saving N. As transcription and translation  
127 cycles of individual genes may vary greatly and possibly irrespective of the growth phase it is difficult  
128 to exactly translate this effect of saving N to growth of individual prokaryotic lineages, but it  
129 demonstrates the great potential of this mode of saving N. This effect is particularly important at  
130 slow growth or during stationary phase at most severe resource limitations when maintenance  
131 metabolism predominates. Such conditions regularly occur in the most nutrient limited permanently  
132 stratified (sub)tropical oceanic gyres. Our results clearly show that reducing AGL is the most critical  
133 and not yet considered evolutionary mode of prokaryotes to adapt to N-limitation. Interestingly, it  
134 has been shown that an abundant marine prokaryote responds to N limitation also on the  
135 transcriptional level. Under N-deplete conditions *Prochlorococcus* starts transcribing various genes  
136 downstream of the transcriptional start site more frequently than under N-replete conditions leading  
137 to a reduced demand of N and other resource in the transcripts<sup>15</sup>. Such a reduction of the transcribed  
138 gene regions may lead to reducing the gene length to a size ensuring the functionality of the encoded  
139 protein as evolutionary adaptation to N-deprived conditions. .

140 As AGL of the genera of the *Pelagibacteraceae* (Fig. 2a,b) is particularly small this indicates that  
141 genome streamlining of this prominent oceanic family does not only lead to a reduction in gene  
142 number<sup>2,4</sup> but also in gene length. Our findings have most interesting evolutionary implications.

143 Mutation, purifying selection, HGT and gene loss are well known mechanisms of the adaptive  
144 evolution of genes and genome streamlining enhancing metabolic efficiency of the evolving  
145 populations at the prevailing environmental conditions<sup>4</sup>. Reduction of gene length, does not only  
146 occurring in prokaryotes but also in bacteriophages, presumably in their state as prophage, is a novel  
147 mechanism of genome reduction but its mode of action is unknown. We speculate that it may act by  
148 non-synonymous or synonymous mutation and subsequent codon deletion, deletion of a gene  
149 fragment downstream of the transcriptional start site or replacement of genes by homologs of  
150 reduced size via HGT while maintaining the metabolic efficiency of the encoded protein at an optimal  
151 or sub-optimal but acceptable level as a trade-off. An important follow-up question is to examine  
152 whether different genes underlie similar constraints of reducing their size and whether this is taxon-  
153 specific or a general feature. Future work is needed to mechanistically understand the molecular  
154 basis of evolutionary reduction of gene length in prokaryotes and phages under environmental  
155 constraints of N-availabilities and possibly energy limitation.

156

## 157 G+C content and N-ARSC of the AOM

158 The G+C content of all genes and the proteomic N-ARSC exhibited also bimodal latitudinal patterns  
159 (Fig. 1d,e). Lowest values consistently occurred in the permanently stratified SAG and the highest  
160 values in the SO and NA. The G+C content correlated positively with annual mean nitrate and N-ARSC  
161 with measured nitrate concentrations and total particulate N (Fig. 2e). G+C content and N-ARSC  
162 correlated also positively (Pearson correlation 0.84,  $p < 0.001$ ), in line with a global trend including all  
163 prokaryotic genomes (Supplementary Fig. 3).

164 The analysis of the normalized genetic G+C content of marine prokaryotes and several virus families  
165 over the transect yielded four distinct patterns grouped into clusters (Fig. 4a-d). Clusters C1 (41.1 %  
166 of all taxa) and C2 (19.3%) showed a general increase of G+C with ambient nitrate concentration.  
167 Both showed highest G+C values in the SO and SA and a decrease in the (sub)tropics. In contrast to

168 cluster C2, C1 exhibited a minor G+C increase in the NA. Both clusters encompassed mainly Alpha-  
169 and Gammaproteobacteria (Fig. 4i) but also other major genera such as *Prochlorococcus*, indicating a  
170 subclass-specific adaptation strategy. Cluster C3 (16.4%) showed an inverse G+C distribution with  
171 high values in the N-depleted SAG and NAG and low values in the SO; it included *Synechococcus* and  
172 the SAR116 clade and other genera of generally low or distinct regional abundance (Fig. 4e,f,  
173 Supplementary Fig. 1). G+C of genera belonging to cluster C4 (23.2%) did not show a consistent  
174 relationship with ambient nitrate concentration but exhibited two distinct peaks in the SA/SAG and  
175 NAG (Fig. 4g,h). C4 consisted mainly of Flavobacteriia (Fig. 4i) as well as genome-streamlined genera  
176 of *Pelagibacteraceae* with an overall low G+C content. These data indicate that lineages known to be  
177 active players of prokaryotic communities in various oceanic regions<sup>16-21</sup> have a relatively low G+C  
178 content in SAG and NAG. All of them, however, exhibit the highest G+C content in SO where growth  
179 is usually not N-limited. These patterns, exhibited by the majority of taxa, are consistent with the  
180 concept of an adaptive evolution towards a reduced G+C content under N-limiting conditions<sup>9,13</sup> even  
181 though the mechanisms involved remain unclear. Mutation bias towards a reduced G+C content and  
182 purifying selection but other not fully understood selective forces<sup>3,8</sup> seem to be involved. The fact  
183 that the selective forces act preferentially on actively transcribed protein coding genes<sup>6</sup> may explain  
184 why predominantly the more prominent and active players of the prokaryotic communities exhibit  
185 these patterns. The lineages with a permanently low G+C content underlie other selective processes,  
186 genome streamlining as they exhibit the smallest genomes<sup>2</sup> and AGL (see above). However, as the  
187 genome size is positively correlated with the G+C content in the larger phylogenetic groups to which  
188 the major lineages of marine pelagic prokaryotes affiliate<sup>7</sup> and also when considering all available  
189 genomes (Supplementary Fig. 3), genome streamlining appears to be inherently associated with  
190 reducing the G+C content. The other lineages with no reduced G+C content in the most strongly N-  
191 limited SAG presumably underlie other evolutionary constraints than N-limitation. They are either  
192 minor components of the microbial communities with generally little activity and thus a presumably  
193 low adaptive evolutionary forcing towards a reduced G+C content<sup>6</sup>. Or they underlie other forces  
194 when they dwell predominantly in less N-depleted regions than SAG, such as *Synechococcus*, or

195 occupy niches with no N-limitation, such as Planktomyces and Verrucomicrobia, on N-rich particles  
196 and Carbon limitation<sup>5,13,22,23</sup>.

197

## 198 Diversity and patterns of genes involved in N-acquisition

199 As availability of N is crucial for oceanic prokaryotes and the evolution of their genomic structure  
200 (see above) an important and related question is in which forms N is available to prokaryotes under  
201 various nutrient regimes. Besides oxidized inorganic forms and neutral gas a variety of reduced N  
202 containing compounds exist (e.g. oligopeptides, amino acids, urea). These are the preferred N-  
203 sources of heterotrophic prokaryotes because reduction of the oxidized forms is energy-costly (Fig.  
204 5a). Break down products of proteins originating predominantly from phytoplankton such as  
205 oligopeptides, dipeptides and free amino acids are major N-sources of heterotrophic and partly of  
206 autotrophic pelagic prokaryotes (Fig. 6a). Ammonium and urea act as important metabolites of the  
207 amino acid and pyrimidine metabolism and can be important N-sources<sup>24–28</sup>. Other reduced organic  
208 N-species including cyanate may be available as well<sup>29</sup> (Fig. 5a). There is some information on the  
209 genetic potential and proteomic spectrum of pelagic prokaryotes to acquire inorganic and organic N-  
210 species in pelagic ecosystems<sup>9,17,18,29,30</sup>. However, we still lack a comprehensive and detailed insight  
211 into the genetic potential of pelagic prokaryotic communities to acquire potentially available  
212 inorganic and organic N-species on a global or ocean-basin scale including regions with and without  
213 strong N-limitation of phytoplankton primary production. This is particularly important considering  
214 the utmost relevance of N in shaping genomic traits of prokaryotes in oceanic systems under N-  
215 limitation (see above) and strong competition for and exploitation of available N-sources. Therefore,  
216 we screened the AOM for key genes involved in the acquisition of the entire range of N-species. The  
217 AOM harbors a large variety of genes encoding transporters of oligo- and dipeptides, various amino  
218 acids, alkylamines, ammonium, cyanate, formamide, nitriles and the metabolism of urea and oxidized  
219 N-species (Fig. 6a,b). Richness and effective number of these genes was lowest in the N-replete SO  
220 (Supplementary Fig. 6). The other N-depleted regions exhibited some variations but no distinct



221 patterns. Although many pathways showed only very low abundances, biogeographic patterns as  
222 well as phylogenetic affiliations were visible. Glutamate synthase, leading to the final step of  
223 intracellular ammonium transfer for further metabolic reactions, comprised 54±6% of the N-  
224 acquisition genes and was highly abundant in the stratified SAG and NAG. Transporters of branched  
225 chain and general amino acids, glycine betaine/proline, octopine/nopaline, oligopeptides,  
226 ammonium, urea and urease and glutamate synthase constituted the great majority of these genes  
227 (Fig. 6a). Genes encoding transporters of general amino acids, urea and ammonium and urease  
228 exhibited highest abundances in SAG whereas those encoding transport of oligopeptides were most  
229 abundant in SO. Genes encoding transporters of glycine betaine/proline, branched chain amino acids  
230 and glutamate synthase showed a more patchy or rather even distribution over the transect (Fig. 6a).  
231 Among the less abundant genes cyanate lyase and nitrilase showed highest abundances in the SO  
232 (Fig. 5b). In general, Alphaproteobacteria exhibited the largest variety of N-acquisition genes,  
233 followed by Gammaproteobacteria (Fig. 6b). Several prokaryotic classes dominated or were distinct  
234 for specific N-acquisition genes: Gammaproteobacteria for transporters of oligopeptides and several  
235 individual amino acids, Betaproteobacteria for denitrification and transporters of  
236 glutamate/aspartate, Bacteroidetes/Flavobacteria for nitrilase, *Synechococcaceae* for assimilatory  
237 nitrate and nitrite reduction and *Prochloraceae* for urea transporters and urease (Fig. 6b,  
238 Supplementary Fig. 7). Hence, the latitudinal distribution of these phylogenetic groups was closely  
239 linked to that of the respective genes. Distribution of genes encoding amino acid transporters among  
240 Alphaproteobacteria reflected the relative abundances of the various families (Supplementary Fig. 8).  
241 However, genes encoding transporters of dipeptides, ammonium transporters and urease were  
242 specifically dominated by distinct families with variation in the different regions (Supplementary Figs.  
243 7, 8).

244 The results demonstrate that the AOM's repertoire of genes acquiring N-containing compounds is  
245 very diverse thus enabling its different members to occupy many niches to exploit the large spectrum  
246 of potentially available N-species. The highest diversity of these genes existed in regions with strong

247 N-limitation, presumably driving this diversification because of the high competition for this very  
248 precious element. The different patterns of N-acquisition genes in the various prokaryotic families  
249 indicate that overlap of different families to exploit N-containing compounds was rather limited thus  
250 emphasizing different strategies and niches for the acquisition of N among free-living bacteria,  
251 presumably reducing functional redundancy. This notion is in line with a recent concept of reduced  
252 functional redundancy due to these auxiliary genetic features not considered in KO categories<sup>31</sup>.  
253 Whereas most N-acquisition genes and their affiliation to phylogenetic groups were expected based  
254 on previous findings<sup>17,18,29</sup> it was unexpected to find genes encoding cyanate lyase affiliated to quite  
255 different bacterial phylogenetic groups. Concentrations of cyanate in pelagic systems are in the nM  
256 range and incorporation can meet up to 10% of total N-demand<sup>32</sup>. So far, use of cyanate has been  
257 attributed mainly to ammonium-oxidizing prokaryotes<sup>29</sup> but our finding of genes encoding cyanate  
258 lyase along the transect suggests that cyanate is used as an N-source for biosynthetic requirements  
259 by other phylogenetic lineages but needs to be tested. It was also surprising to find  
260 optopine/nopaline transporter-like sequences, especially in *Pelagibacteraceae*. Both are derivatives  
261 of the amino acids glutamate, arginine and alanine and their transport systems are known from  
262 *Agrobacterium tumefaciens*. Both compounds are produced by the host plants after infection by the  
263 virulence plasmid to promote growth of tumors and the production of secondary metabolites<sup>33</sup>.  
264 Genes encoding these transporters have not been described in marine prokaryotes. Whether our  
265 finding is based on incorrect gene annotation or indicates that these transporters may also mediate  
266 uptake of other similar compounds needs to be tested.

267

## 268 *Conclusion*

269 Our investigation shows that availability of N in the form of nitrate and related biogeochemical  
270 effects such as limitation of phytoplankton primary production have fundamental effects on shaping  
271 genomic and proteomic traits of the microbiome of the sunlit Atlantic Ocean. Shifts in community  
272 wide AGL and G+C content were not caused by a changing community structure but were evident for

273 many and in particular major phylogenetic groups which exhibited respective variation in the  
274 genomic G+C content, N-ARSC and as a completely novel finding AGL. AGL has the greatest effect on  
275 reducing the N-demand and can vary by approximately 20% within a narrow phylogenetic range. In  
276 response to the sparse availability of N in particular in the N-depleted regions a highly diverse  
277 repertoire of N-acquisition genes in the different prokaryotic families is present which enables the  
278 AOM to maximize N-acquisition. The discovery that AGL is affected by N-availability presumably is  
279 not restricted to oceanic prokaryotic communities but may be a consequence of N-deficiency also in  
280 other N-limited prokaryotic communities.

281

282 Methods, along with any additional Extended Data display items and Source Data and related  
283 references, are available in the online version of the paper.

284

## 285 **Acknowledgements**

286 We thank the master, his crew and the principal scientists (M. Lucassen, K. Bumke) of cruises ANT  
287 XXVIII/4 and -/5 of RV Polarstern, T.H. Badewien, A. Gavrillov, S. Rackebrandt, T. Remke, J. Vollmers,  
288 M. Wietz, I. Wagner-Döbler and M. Wurst for cruise support, M. Heinemann, B. Kuerzel, R. Weinert  
289 and C. Lehnert for technical laboratory assistance. Constructive suggestions by S. Biller on an earlier  
290 version of this manuscript are gratefully acknowledged. This work was funded by Deutsche  
291 Forschungsgemeinschaft within the Collaborative Research Center *Roseobacter* (TRR51) and the  
292 Graduate Research training group “The Ecology of Molecules” (EcoMol) supported by the Lower  
293 Saxony Ministry for Science and Culture.

294

## 295 **Author contribution**

296 LD carried out the bioinformatics and statistical analyses and wrote the draft of the publication; AP  
297 and BP carried out the metagenomics sequencing and quality control of the raw sequences; BW  
298 carried out sampling and sample filtration; HAG analyzed nitrate concentrations; RD supervised the

299 metagenomics sequencing and contributed to reviewing the manuscript; MS designed the study,  
300 supervised the bioinformatics and statistical analyses and finalized the draft manuscript. All authors  
301 reviewed the manuscript.

302

## 303 **Methods**

304 Twenty-two stations between 62°S and 47°N were visited during cruises ANT XXVIII/4, 13 March–9  
305 April 2012, and ANT XXVIII/5, 10 April–15 May 2012, with RV Polarstern. For exact locations of the  
306 stations see Table S1. Samples were collected at 20 m depth with 12 I-Niskin bottles mounted on a  
307 Sea-Bird Electronics SBE 32 Carousel Water Sampler equipped with a temperature, salinity, depth  
308 probe (SBE 911 plus probe), a chlorophyll fluorometer (Wet Labs ECO – AFL/FL) and transmissometer  
309 (Wet Labs C-Star). Nitrate concentration was analyzed in prefiltered (0.2 µm, isopore membrane  
310 filter, EMD Millipore Corporation, USA) and HgCl<sub>2</sub>-preserved and frozen (-20°C) subsamples in the  
311 home lab after thawing using a microtiter plate reader (FLUOstar Optima, BMG Labtech, Germany)  
312 following established procedures for N oxides (NO<sub>x</sub>)<sup>34</sup>. For the analysis of total particulate N (TPN), 1–  
313 4 l of seawater were filtered through Whatman GF/F filters and stored at -20°C until analysis in the  
314 home lab. POC and TPN were analyzed as described previously<sup>35</sup>. For metagenomics analysis, water  
315 of several bottles was pooled in an ethanol-rinsed polyethylene barrel to a total volume of 40 l.  
316 Within 60 min after collection the sample was prefiltered through a 10-µm nylon net and a filter  
317 sandwich consisting of a glass fiber filter (47 mm diameter, Whatman GF/D; Whatman, Maidstone,  
318 UK) and 3.0-µm polycarbonate filter (47 mm diameter, Nuclepore; Whatman). Picoplankton was  
319 harvested on a filter sandwich consisting of a glass fiber filter (47 mm diameter, Whatman GF/F;  
320 Whatman) and 0.2-µm polycarbonate filter (47 mm diameter, Nuclepore; Whatman). All filters were  
321 immediately frozen in liquid N and stored at -80°C until further processing. Environmental DNA was  
322 extracted from the filter sandwich and subsequently purified employing the peqGOLD gel extraction  
323 kit (Peqlab, Erlangen, Germany) as described previously<sup>36</sup>. Illumina shotgun libraries were prepared  
324 using the Nextera DNA Sample Preparation kit as recommended by the manufacturer (Illumina, San  
325 Diego, USA). To assess quality and size of the libraries, samples were run on an Agilent Bioanalyzer

326 2100 using an Agilent High Sensitivity DNA kit as recommended by the manufacturer (Agilent  
327 Technologies, Waldbronn, Germany). Concentrations of the libraries were determined using the  
328 Qubit® dsDNA HS Assay Kit as recommended by the manufacturer (Life Technologies GmbH,  
329 Darmstadt, Germany). Sequencing was performed by using the HiSeq2500 instrument (Illumina Inc.,  
330 San Diego, USA) using the HiSeq Rapid PE Cluster Kit v2 for cluster generation and the HiSeq Rapid SBS  
331 Kit (500 cycles) for sequencing in the paired-end mode and running 2x250 cycles.

332 **Annual mean nitrate concentrations.** Annual mean nitrate concentrations at 20 m depth of each  
333 station were extracted from the 1° World Ocean Atlas 2009, provided by the National Oceanic and  
334 Atmospheric Administration (<https://www.nodc.noaa.gov/cgi-bin/OC5/woa18f/>).

335 **Metagenomic assembly and gene prediction.** Illumina reads were quality checked and low-quality  
336 regions as well as adaptor sequences were trimmed using Trimmomatic 0.36<sup>37</sup> (*ADAPTER:2:30:10*  
337 *SLIDINGWINDOW:4:25 MINLEN:100*). The high quality (HQ) reads were assembled using metaSPAdes  
338 3.11.1<sup>38</sup>. Contigs smaller than 210 bp and average coverage <2 were discarded. Gene-coding  
339 sequences of the assembled contigs were predicted using Prodigal 2.6.2 in meta-mode<sup>39</sup>. Genes  
340 shorter than 210 bp and longer than 4,500 bp were discarded to account for prokaryotic and  
341 eukaryotic gene length. This resulted in 8.38 M partial and 3.67 M complete unique gene sequences  
342 (supplementary table S2).

343 **Taxonomic classification of gene sequences.** Gene sequences were taxonomically classified using  
344 Kaiju 1.6<sup>40</sup> (*-greedy* mode with 5 allowed substitutions and e-value 10e-5) and the NCBI nr database  
345 (downloaded on 2018-05-29) including prokaryotic, eukaryotic and viral sequences as well as the  
346 proGenomes database<sup>41</sup> (downloaded on 2019-07-26). Gene taxonomy was compared between both  
347 approaches and last known ancestor was inferred from the highest available phylogenetic resolution.  
348 In total 63.4% of all unique genes and 55.7% of complete genes were taxonomically classified.

349 **Gene catalogue generation.** To generate a non-redundant (nr) gene catalogue, gene sequences were  
350 clustered at 95% identity using USEARCH 10.0.24<sup>42</sup> (*-cluster\_fast-id 0.95*). The resulting 7.75 M

351 cluster centroids were used as representative AOM gene sequences. Genes were taxonomically  
352 classified as described above. Gene functions were assigned using the Kyoto Encyclopedia of Genes  
353 and Genomes (KEGG) online annotation tool GhostKOALA<sup>43</sup> (<https://www.kegg.jp/ghostkoala/>) using  
354 the prokaryotic, eukaryotic and viral KEGG gene database (release 86) and default settings. In total,  
355 59% of genes were taxonomically classified and 39% of all sequences were assigned to a KEGG  
356 orthologue (KO).

357 **Illumina read abundance and normalization.** To acquire gene abundance data, HQ Illumina reads  
358 longer than 75 bp were mapped to the AOM gene sequences using bowtie2<sup>44</sup> 2.3.5 (*--very-sensitive-*  
359 *local* mode). SAMtools<sup>45</sup> version 1.9-58-gbd1a409 was used to convert the SAM alignment file to read  
360 abundance tables. Reads that did not map to any nr sequence were discarded. To account for  
361 different sequencing depth and gene length, counts from each station were normalized by dividing  
362 read counts by gene length in kb to obtain reads per kilobase (RPK). Subsequently scaling factors  
363 were calculated for each sample by dividing the sum of RPKs by one million. The scaling factors were  
364 used to normalize the RPKs of each sample to counts per million (CPM)<sup>46</sup>

365 **Determination of G+C, N/C-ARSC, molecular protein weight and gene length.** To determine G+C  
366 content, Nitrogen/Carbon content of amino acid residual side chains (N/C-ARSC) genes predicted  
367 from individual stations were classified as described above. G+C content of each predicted gene was  
368 determined by dividing the total amount of G and C bases by the total gene length. To determine N-  
369 and C-ARSC, nucleotide sequences were translated to amino acids. Average N and C content of amino  
370 acid side chains was calculated for every gene according to sum formula of each amino acid. The  
371 same approach of gene prediction and determination of genomic traits was applied to 16,834  
372 complete bacterial reference genomes downloaded from NCBI GenBank (January 2020).

373 **Statistical analysis.** All statistical evaluations were performed in R (version 3.6.0; [https://www.r-](https://www.r-project.org/)  
374 [project.org/](https://www.r-project.org/)) using the additional packages *vegan*<sup>47</sup> (v2.5-6), *ape*<sup>48</sup> (v5.3), and *cluster*<sup>49</sup> (v2.0.8).

375 **AGL, G+C content, and N-ARSC.** Patterns of AGL were analyzed on the level of complete genes of  
376 prokaryotic genera and virus families. For a similar analysis of the G+C content also incomplete genes  
377 were included. Only taxa with more 50 genes (min. 10kb) in  $\geq 50\%$  of all samples were considered.  
378 Stations with less than 50 genes were excluded in the analysis of each taxon.

379 To compare trends across genera, AGL and G+C content were normalized to values between 0 and 1  
380 (formula:  $x - \min(x) / \max(x) - \min(x)$ ). Euclidean distances of G+C and AGL profiles were calculated and  
381 subsequently clustered using minimal variance Ward.D2 clustering. Linear/non-linear model fitting  
382 was used to determine a relationship between G+C and AGL to annual mean nitrate concentration  
383 for each resulting cluster. Correlations between AGL, G+C, and N/C-ARSC and environmental  
384 parameters were calculated from all stations where data with environmental data were available  
385 (Table S1). P-values  $\leq 0.05$  were considered significant.

386 To analyse geographic distribution patterns, abundances of genes involved in N-acquisition  
387 (Supplementary Table 3) were normalised to values between 0 and 1 (see above). Effective number  
388 of the same genes was calculated after Jost 2006<sup>50</sup>.

389 **Data availability.** Sequence data were deposited under the INSDC accession number PRJEB34453 in  
390 the European Nucleotide Archive (ENA) using the data brokerage service of the German Federation  
391 for Biological Data<sup>51</sup> (GFBio), in compliance with the Minimal Information about any (X) Sequence  
392 (MIxS)<sup>52</sup> standard. Environmental data of the stations and depth collected during cruises ANTXXVIII/4  
393 and -/5 are available at <https://doi.pangaea.de/10.1594/PANGAEA.906247>.

394

## References

1. Mira, A., Ochman, H. & Moran, N. A. Deletional bias and the evolution of bacterial genomes. *Trends in Genetics* **17**, 589–596 (2001).
2. Giovannoni, S. J., Cameron Thrash, J. & Temperton, B. Implications of streamlining theory for microbial ecology. *ISME J.* **8**, 1553–1565 (2014).
3. Long, H. *et al.* Evolutionary determinants of genome-wide nucleotide composition. *Nat. Ecol. Evol.* **2**, 237–240 (2018).
4. Luo, H., Huang, Y., Stepanauskas, R. & Tang, J. Excess of non-conservative amino acid changes in marine bacterioplankton lineages with reduced genomes. *Nat. Microbiol.* **2**, 1–9 (2017).
5. Galand, P. E., Pereira, O., Hochart, C., Auguet, J. C. & Debroas, D. A strong link between marine microbial community composition and function challenges the idea of functional redundancy. *ISME J.* **12**, 2470–2478 (2018).
6. Raghavan, R., Kelkar, Y. D. & Ochman, H. A selective force favoring increased G+C content in bacterial genes. *Proc. Natl. Acad. Sci. U. S. A.* **109**, 14504–14507 (2012).
7. Bohlin, J., Sekse, C., Skjerve, E. & Brynildsrud, O. Positive correlations between genomic %AT and genome size within strains of bacterial species. *Environ. Microbiol. Rep.* **6**, 278–286 (2014).
8. Shenhav, L. & Zeevi, D. Resource conservation manifests in the genetic code. *bioRxiv* 790345 (2019). doi:10.1101/790345
9. Mende, D. R. *et al.* Environmental drivers of a microbial genomic transition zone in the ocean's interior. *Nat. Microbiol.* **2**, 1367–1373 (2017).
10. Grzymalski, J. J. & Dussaq, A. M. The significance of nitrogen cost minimization in proteomes of marine microorganisms. *Isme J.* **6**, 71 (2011).
11. Bragg, J. G. & Hyder, C. L. Nitrogen versus carbon use in prokaryotic genomes and proteomes. *Proc. R. Soc. London. Ser. B Biol. Sci.* **271**, (2004).
12. Moore, C. M. *et al.* Processes and patterns of oceanic nutrient limitation. *Nat. Geosci.* **6**, 701 (2013).
13. Hellweger, F. L., Huang, Y. & Luo, H. Carbon limitation drives GC content evolution of a marine bacterium in an individual-based genome-scale model. *ISME J.* **12**, 1180–1187 (2018).
14. Aiken, J. *et al.* A synthesis of the environmental response of the North and South Atlantic Sub-Tropical Gyres during two decades of AMT. *Prog. Oceanogr.* **158**, 236–254 (2017).
15. Read, R. W. *et al.* Nitrogen cost minimization is promoted by structural changes in the transcriptome of N-deprived *Prochlorococcus* cells. *ISME J.* **11**, 2267–2278 (2017).
16. Elifantz, H., Dittel, A., Cottrell, M. & Kirchman, D. Dissolved organic matter assimilation by heterotrophic bacterial groups in the western Arctic Ocean. *Aquat. Microb. Ecol.* **50**, 39–49



- (2007).
17. Sowell, S. M. *et al.* Transport functions dominate the SAR11 metaproteome at low-nutrient extremes in the Sargasso Sea. *ISME J.* **3**, 93–105 (2009).
  18. Sowell, S. M. *et al.* Environmental proteomics of microbial plankton in a highly productive coastal upwelling system. *ISME J.* **5**, 856–865 (2011).
  19. Tada, Y. *et al.* Differing growth responses of major phylogenetic groups of marine bacteria to natural phytoplankton blooms in the Western North Pacific Ocean. *Appl. Environ. Microbiol.* **77**, 4055–4065 (2011).
  20. Tada, Y., Makabe, R., Kasamatsu-Takazawa, N., Taniguchi, A. & Hamasaki, K. Growth and distribution patterns of Roseobacter/Rhodobacter, SAR11, and Bacteroidetes lineages in the Southern Ocean. *Polar Biol.* **36**, 691–704 (2013).
  21. Bakenhus, I. *et al.* Composition of Total and Cell-Proliferating Bacterioplankton Community in Early Summer in the North Sea – Roseobacters Are the Most Active Component. *Frontiers in Microbiology* **8**, 1771 (2017).
  22. Smith, D. C., Simon, M., Alldredge, A. L. & Azam, F. Intense hydrolytic enzyme activity on marine aggregates and implications for rapid particle dissolution. *Nature* **359**, 139–142 (1992).
  23. Milici, M. *et al.* Co-occurrence Analysis of Microbial Taxa in the Atlantic Ocean Reveals High Connectivity in the Free-Living Bacterioplankton. *Frontiers in Microbiology* **7**, 649 (2016).
  24. Keil, R. & Kirchman, D. Utilization of dissolved protein and amino acids in the northern Sargasso Sea. *Aquat. Microb. Ecol.* **18**, 293–300 (1999).
  25. Varela, M. M., Bode, A., Morán, X. A. G. & Valencia, J. Dissolved organic nitrogen release and bacterial activity in the upper layers of the Atlantic Ocean. *Microb. Ecol.* **51**, 487–500 (2006).
  26. Simon, M. & Rosenstock, B. Different coupling of dissolved amino acid, protein, and carbohydrate turnover to heterotrophic picoplankton production in the Southern Ocean in austral summer and fall. *Limnol. Oceanogr.* **52**, 85–95 (2007).
  27. Painter, S., Sanders, R., Waldron, H., Lucas, M. & Torres-Valdes, S. Urea distribution and uptake in the Atlantic Ocean between 50°N and 50°S. *Mar. Ecol. Prog. Ser.* **368**, 53–63 (2008).
  28. Sipler, R. E. & Bronk, D. A. Chapter 4 - Dynamics of Dissolved Organic Nitrogen. in (eds. Hansell, D. A. & Carlson, C. A. B. T.-B. of M. D. O. M. (Second E.) 127–232 (Academic Press, 2015). doi:<https://doi.org/10.1016/B978-0-12-405940-5.00004-2>
  29. Widner, B., Fuchsman, C. A., Chang, B. X., Rocap, G. & Mulholland, M. R. Utilization of urea and cyanate in waters overlying and within the eastern tropical north Pacific oxygen deficient zone. *FEMS Microbiol. Ecol.* **94**, (2018).
  30. Li, Y.-Y. *et al.* Bacterial Diversity and Nitrogen Utilization Strategies in the Upper Layer of the Northwestern Pacific Ocean. *Front. Microbiol.* **9**, 797 (2018).

31. Louca, S. *et al.* Function and functional redundancy in microbial systems. *Nature Ecology and Evolution* **2**, 936–943 (2018).
32. Widner, B., Mulholland, M. R. & Mopper, K. Distribution, Sources, and Sinks of Cyanate in the Coastal North Atlantic Ocean. *Environ. Sci. Technol. Lett.* **3**, 297–302 (2016).
33. Tam, R. & Saier, M. H. Structural, functional, and evolutionary relationships among extracellular solute-binding receptors of bacteria. *Microbiological Reviews* **57**, 320–346 (1993).
34. Schnetger, B. & Lehnert, C. Determination of nitrate plus nitrite in small volume marine water samples using vanadium(III)chloride as a reduction agent. *Mar. Chem.* **160**, 91–98 (2014).
35. Lunau, M., Lemke, A., Dellwig, O. & Simon, M. Physical and biogeochemical controls of microaggregate dynamics in a tidally affected coastal ecosystem. *Limnol. Oceanogr.* **51**, 847–859 (2006).
36. Weinbauer, M. G., Fritz, I., Wenderoth, D. F. & Höfle, M. G. Simultaneous extraction from bacterioplankton of total RNA and DNA suitable for quantitative structure and function analyses. *Appl. Environ. Microbiol.* **68**, 1082–7 (2002).
37. Bolger, A. M., Lohse, M. & Usadel, B. Trimmomatic: a flexible trimmer for Illumina sequence data. *Bioinformatics* **30**, 2114–2120 (2014).
38. Bankevich, A. *et al.* SPAdes: A New Genome Assembly Algorithm and Its Applications to Single-Cell Sequencing. *J. Comput. Biol.* **19**, 455 (2012).
39. Hyatt, D. *et al.* Prodigal: prokaryotic gene recognition and translation initiation site identification. *BMC Bioinformatics* **11**, 119 (2010).
40. Menzel, P., Ng, K. L. & Krogh, A. Fast and sensitive taxonomic classification for metagenomics with Kaiju. *Nat. Commun.* **7**, 11257 (2016).
41. Mende, D. R. *et al.* proGenomes: a resource for consistent functional and taxonomic annotations of prokaryotic genomes. *Nucleic Acids Res.* **45**, D529–D534 (2017).
42. Edgar, R. C. Search and clustering orders of magnitude faster than BLAST. *Bioinformatics* **26**, 2460–2461 (2010).
43. Kanehisa, M., Sato, Y. & Morishima, K. BlastKOALA and GhostKOALA: KEGG Tools for Functional Characterization of Genome and Metagenome Sequences. *J. Mol. Biol.* **428**, 726–731 (2016).
44. Langmead, B. & Salzberg, S. L. Fast gapped-read alignment with Bowtie 2. *Nat. Methods* **9**, 357–359 (2012).
45. Li, H. *et al.* The Sequence Alignment/Map format and SAMtools. *Bioinformatics* **25**, 2078–2079 (2009).
46. Wagner, G. P., Kin, K. & Lynch, V. J. Measurement of mRNA abundance using RNA-seq data:

- RPKM measure is inconsistent among samples. *Theory Biosci.* **131**, 281–285 (2012).
47. Oksanen, J. *et al.* vegan: Community Ecology Package. R package version 2.5-5. <https://CRAN.R-project.org/package=vegan> (2019).
  48. Paradis, E. & Schliep, K. ape 5.0: an environment for modern phylogenetics and evolutionary analyses in R. *Bioinformatics* **35**, 526–528 (2019).
  49. Maechler, M., Rousseeuw, P., Struyf, A., Hubert, M. & Hornik, K. Cluster: Cluster analysis basics and extensions. R package version 2.0. 8. (2019).
  50. Jost, L. Entropy and diversity. *Oikos* **113**, 363–375 (2006).
  51. Diepenbroek, M. *et al.* Towards an integrated biodiversity and ecological research data management and archiving platform: the German federation for the curation of biological data (GFBio). in *Informatik 2014* (eds. Plödereeder, E., Grunske, L., Schneider, E. & Ull, D.) 1711–1721 (Gesellschaft für Informatik e.V., 2014).
  52. Yilmaz, P. *et al.* Minimum information about a marker gene sequence (MIMARKS) and minimum information about any (x) sequence (MIxS) specifications. *Nat. Biotechnol.* **29**, 415–420 (2011).

Figures:

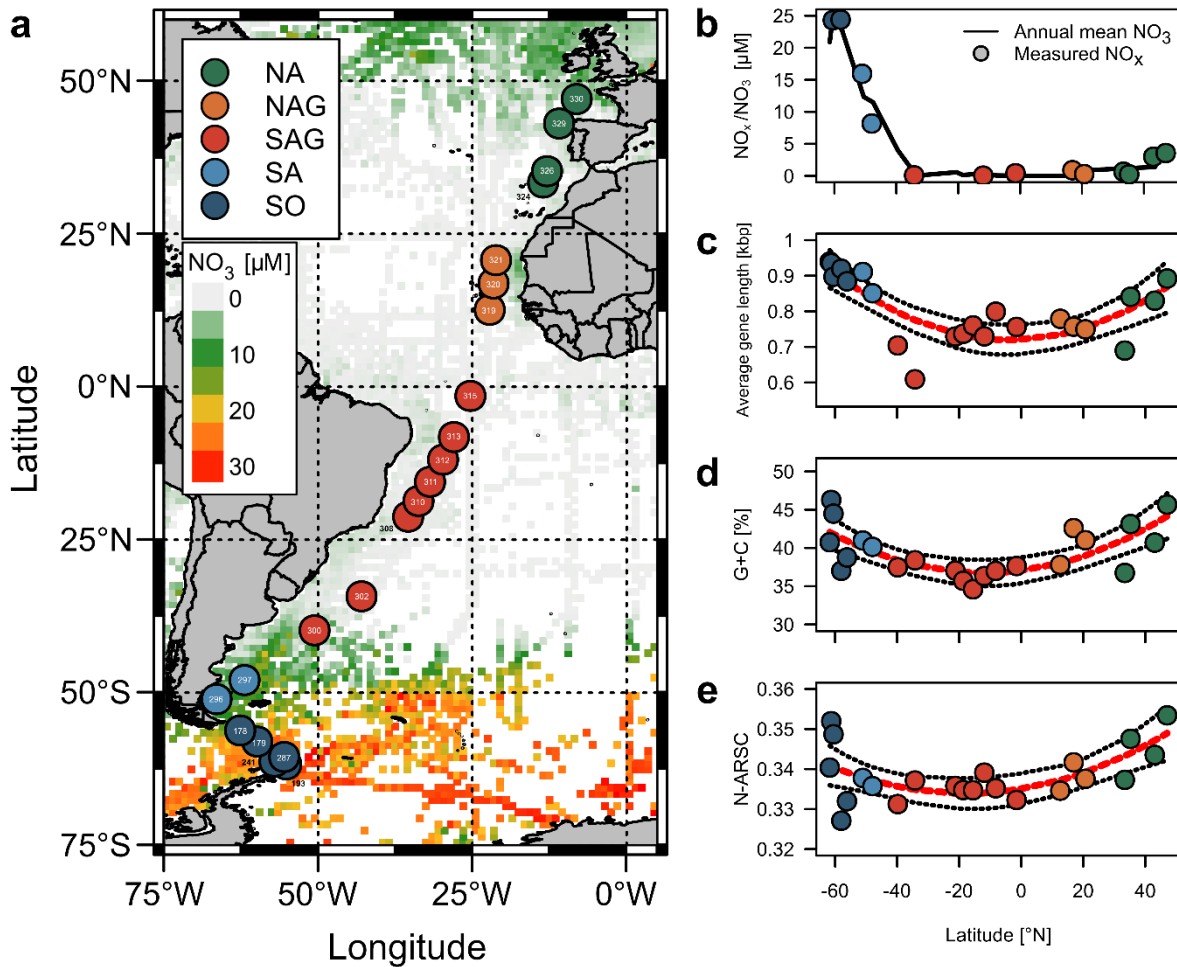

**Figure 1**

**Stations and nitrate in the Atlantic and Southern Ocean visited during cruises ANTXXVIII/4 and -/5 with RV Polarstern and N-related genomic features of the Atlantic Ocean Microbiome (AOM).** **a**, station location in the biogeographic regions SO, SA, SAG, NAG and NA (for abbreviations see text and for station details Table S1). Numbers of station are given in the circles and overlaid on a map with annual mean surface concentrations of nitrate (<https://www.nodc.noaa.gov/OC5/woa18f/index.html>). **b**, annual mean and ambient surface concentrations of nitrate and NO<sub>x</sub> (nitrate+nitrite) in the biogeographic regions along the transect. **c-e**, distribution of AGL, genomic G+C content and N-ARSC in the biogeographic regions and their Spearman correlations (red line) and 95% confidence intervals (black dotted line) with latitude (AGL:  $r^2$ : 0.58,  $p < 0.001$ ; G+C:  $r^2$ : 0.46,  $p = 0.001$ ; N-ARSC:  $r^2$ : 0.34,  $p = 0.007$ ).

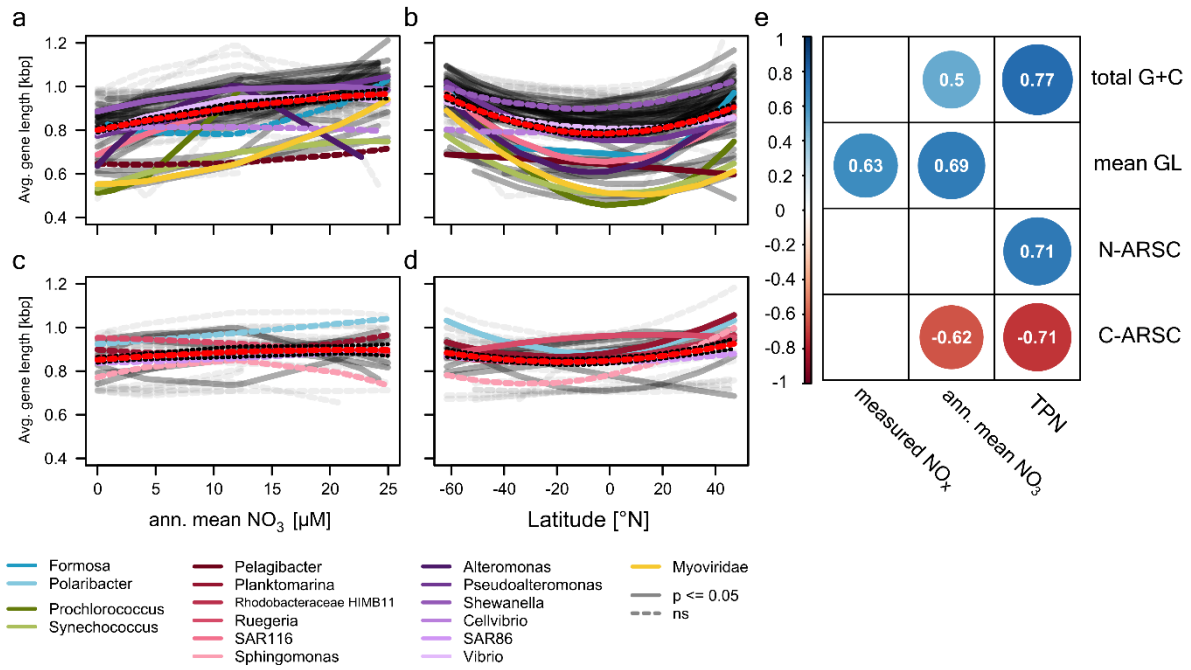

**Figure 2**

**Correlation of AGL and genomic G+C content and N-ARSC of the AOM with latitude, nitrate and total particulate nitrogen (TPN).** a-d, Correlations of AGL of clusters C1 and C2 encompassing major prokaryotic genera and virus families (see legend) with nitrate and latitude. Patterns were determined by using unimodal models. e, Correlation coefficients of Pearson correlations ( $p \leq 0.05$ ) of AGL, genomic G+C content and N-ARSC with ambient and annual mean surface nitrate concentrations and TPN.

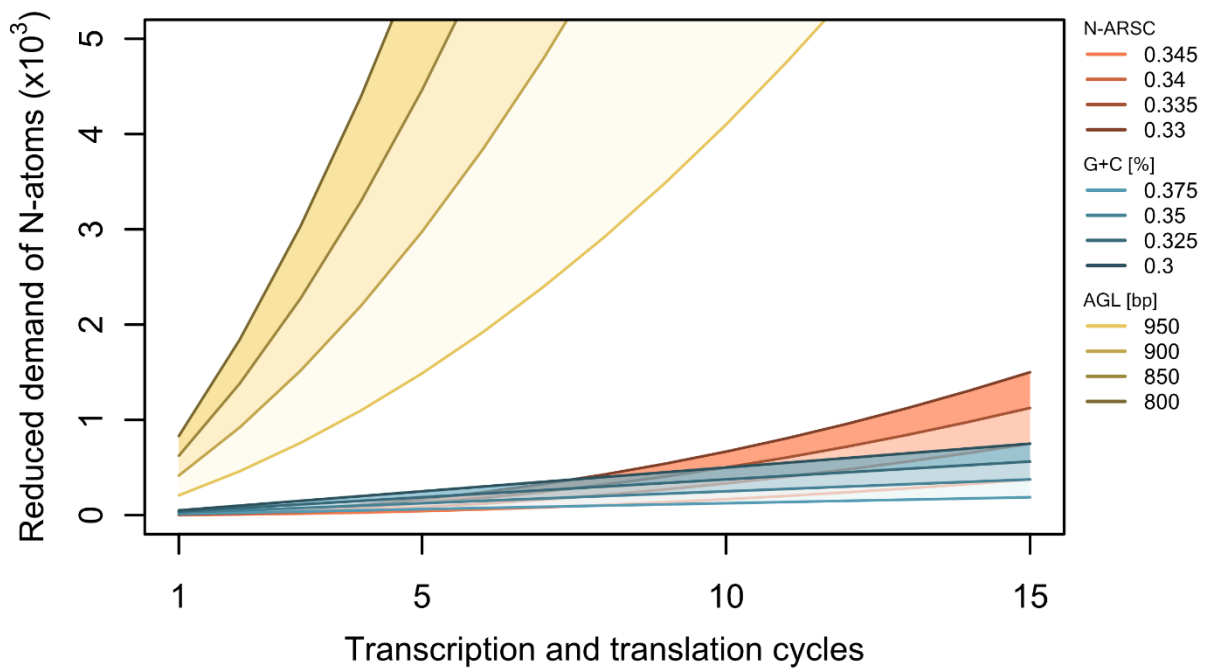

Figure 3

**Reduction of N demand for given ranges of gene length, genomic G+C content and N-ARSC over increasing numbers of transcription and translation cycles.** Numbers of N atoms saved were calculated for the given values of N-ARSC, G+C content and gene length for nucleotides needed for the transcription and translation cycles and amino acids produced for protein synthesis based on a reference gene length of 1000 bp, G+C content of 40% and an N-ARSC of 0.35. These reference values were in the range of values occurring in N-replete regions of our data set.

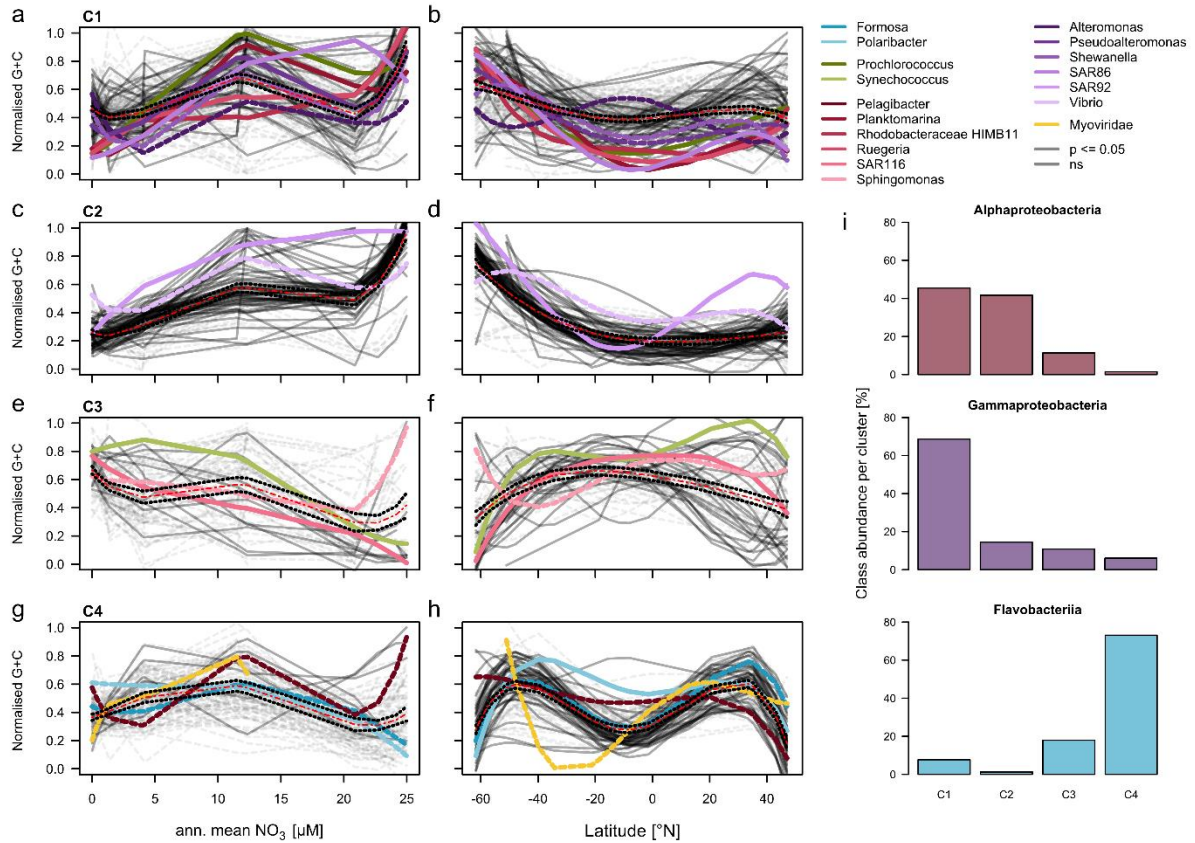

**Figure 4**

**Patterns of the genomic G+C content of the AOM.** a-h, Correlations of the normalized G+C content of four clusters (C1, C2, C3, C4) of major prokaryotic genera and virus families (see legend) in the Atlantic and Southern Ocean in correlation to annual surface nitrate concentration and latitude. Patterns were determined by using non-linear models. Fit significance of each genus is indicated by a solid line (for further details see legend). i, Affiliation of major classes of prokaryotes to clusters C1 to C4 of the G+C correlation patterns.

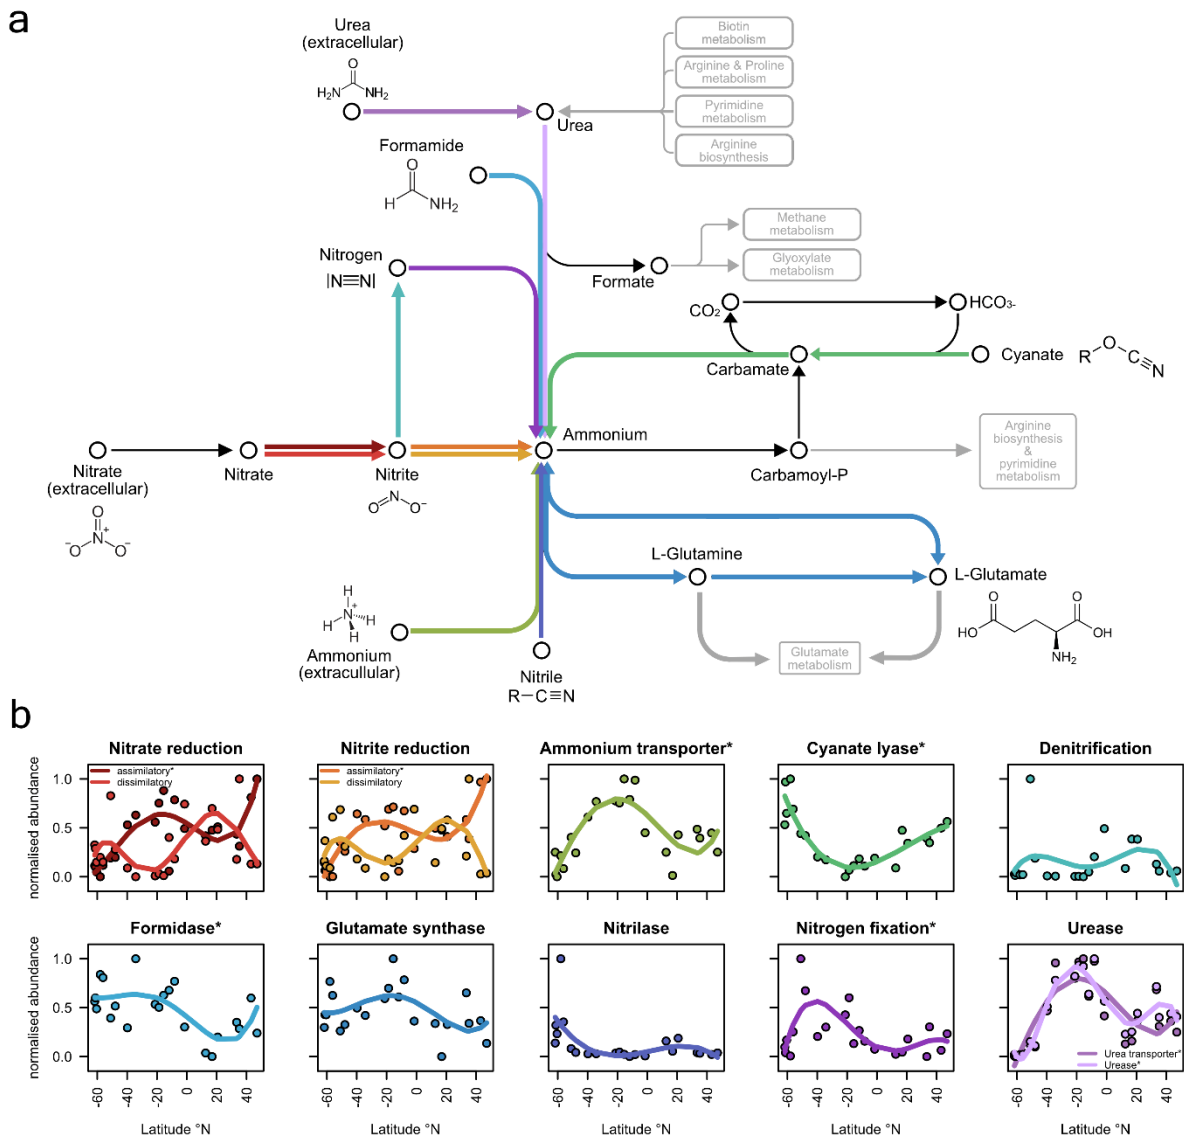

**Figure 5**

**N-acquisition genes and their distribution along the Atlantic Ocean transect. a**, pathways of N-acquisition genes leading to intracellular ammonium. **b**, normalised distribution of N-acquisition genes along the transect.



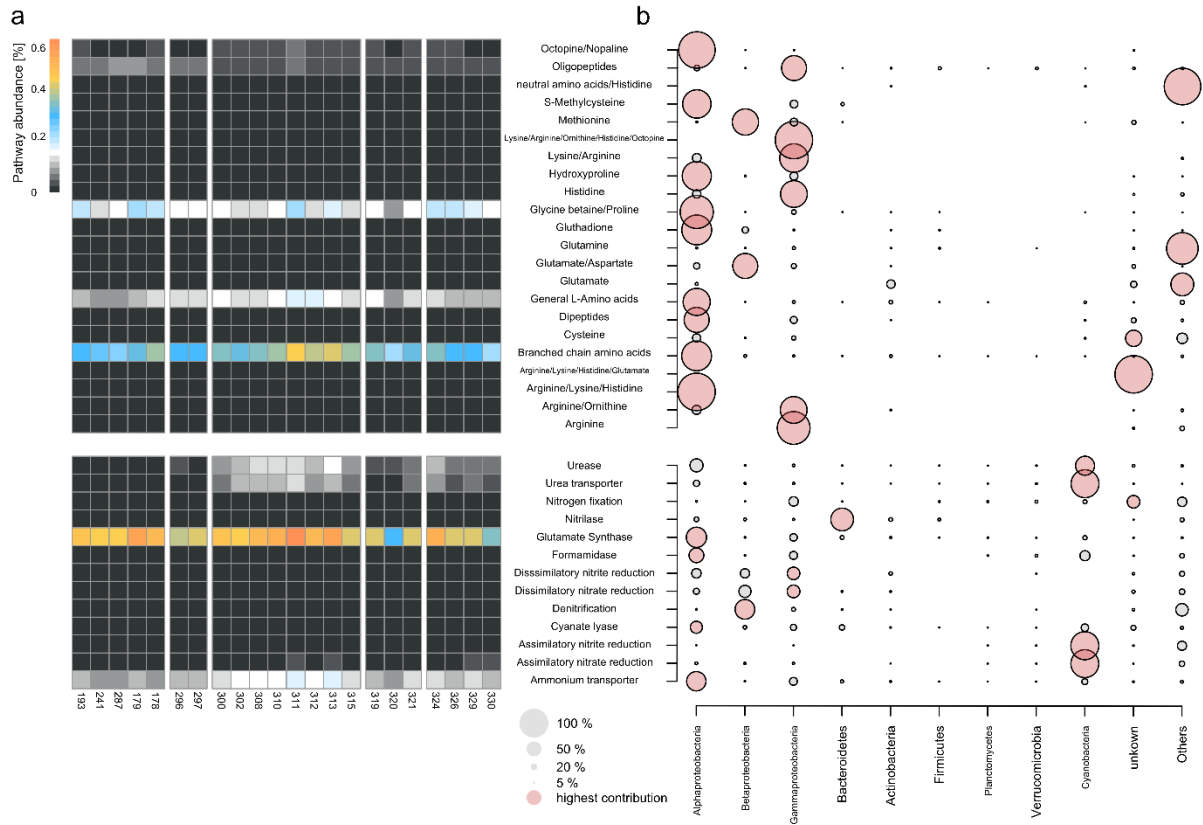

**Figure 6**

**N-acquisition genes along the transect and their distribution among the prokaryotic groups of the AOM** **a**, relative abundance of genes encoding transporters of amino acid-related and other organic N-compounds at stations along the transect. **b**, relative distribution pathways and transporters among prokaryotic phyla and classes. For higher phylogenetic resolution of major lineages see supplementary Fig. S7, S8.

## Supplementary Material

### Tables

**Table S1** Station details, hydrography, nitrate, G+C, AGL and N/C-ARSC-data

**Table S2** Sequencing and assembly statistics of the Atlantic Ocean Metagenomes

**Table S3** List of genes encoding proteins of N-acquisition and AA-transport

### Figures

**Figure S1:** Heatmap of Relative abundances of prominent taxa in the Southern and Atlantic Ocean

**Figure S2:** Heatmap of taxonomically resolved AGL data and clusters

**Figure S3:** Correlation of genome size and G+C content, genome size and G+C content (NCBI-data of available genomes).

**Figure S4:** Dendrogram based on patterns of G+C distribution among prokaryotic genera and virus families

**Figure S5:** Heatmap of taxonomically resolved G+C data

**Figure S6:** Richness and EN of N-acquisition genes

**Figure S7:** Taxonomically resolved abundances of N-acquisition pathways

**Figure S8:** Taxonomically resolved abundances of amino acid transport systems
